# Supplementary material for: The Clinical Diagnosis-Based Nationwide Epidemiology of Metabolic Dysfunction-Associated Liver Disease in Korea
Source: MDPI journal article supplement (doi:10.3390/jcm12247634), 2023-12-12
Supplement: s1 [file s1]

## Supplementary Tables

Table S1. Annual incidence (per 1000 persons) of MASL according to age group in Korea

| Year         | Incidence of Male/Female by age (year) |               |               |               |               |               |               | Total         |
|--------------|----------------------------------------|---------------|---------------|---------------|---------------|---------------|---------------|---------------|
|              | 20-29                                  | 30-39         | 40-49         | 50-59         | 60-69         | 70-79         | ≥ 80          |               |
| 2010         | 5.70                                   | 10.63         | 12.83         | 16.92         | 18.11         | 16.04         | 11.84         | 9.80          |
|              | 5.78                                   | 8.10          | 10.53         | 18.39         | 20.01         | 16.52         | 9.13          | 9.61          |
| 2011         | 6.06                                   | 11.09         | 13.16         | 16.84         | 17.57         | 15.68         | 14.11         | 10.09         |
|              | 5.64                                   | 7.90          | 10.27         | 17.75         | 18.76         | 16.04         | 10.01         | 9.47          |
| 2012         | 5.41                                   | 10.01         | 12.25         | 16.18         | 17.42         | 15.32         | 11.85         | 9.60          |
|              | 5.19                                   | 7.31          | 9.76          | 17.10         | 18.39         | 15.70         | 9.54          | 9.19          |
| 2013         | 5.49                                   | 9.84          | 12.02         | 15.03         | 16.67         | 14.76         | 12.21         | 9.42          |
|              | 5.29                                   | 7.31          | 9.75          | 16.81         | 18.12         | 15.01         | 9.43          | 9.22          |
| 2014         | 5.62                                   | 9.94          | 11.66         | 14.15         | 15.77         | 13.55         | 11.25         | 9.23          |
|              | 5.33                                   | 7.39          | 9.28          | 15.99         | 17.17         | 14.15         | 9.29          | 9.00          |
| 2015         | 5.93                                   | 10.55         | 12.16         | 14.31         | 16.09         | 13.80         | 11.92         | 9.66          |
|              | 5.39                                   | 7.49          | 9.52          | 16.43         | 17.83         | 14.52         | 9.59          | 9.37          |
| 2016         | 6.68                                   | 11.89         | 13.56         | 15.48         | 17.29         | 14.42         | 11.88         | 10.71         |
|              | 5.92                                   | 8.42          | 10.36         | 18.04         | 19.31         | 15.22         | 9.76          | 10.31         |
| 2017         | 6.85                                   | 12.09         | 13.55         | 15.16         | 16.60         | 14.32         | 12.26         | 10.75         |
|              | 6.26                                   | 8.61          | 10.50         | 17.69         | 18.77         | 15.01         | 10.25         | 10.42         |
| 2018         | 7.56                                   | 14.28         | 16.24         | 18.53         | 20.84         | 17.98         | 14.94         | 13.05         |
|              | 6.76                                   | 9.94          | 12.28         | 21.43         | 23.80         | 19.02         | 12.13         | 12.66         |
| 2019         | 8.49                                   | 16.06         | 18.63         | 20.58         | 23.43         | 20.34         | 16.19         | 14.82         |
|              | 7.54                                   | 11.20         | 14.11         | 23.55         | 26.90         | 21.85         | 13.49         | 14.41         |
| 2020         | 7.99                                   | 14.50         | 16.54         | 17.41         | 19.91         | 17.39         | 13.62         | 13.05         |
|              | 7.23                                   | 10.49         | 12.62         | 19.95         | 23.21         | 18.72         | 11.56         | 12.80         |
| 2021         | 8.93                                   | 15.99         | 18.49         | 18.20         | 19.81         | 16.91         | 13.57         | 14.18         |
|              | 8.30                                   | 12.09         | 14.12         | 20.72         | 23.24         | 18.35         | 11.21         | 13.72         |
| Mean<br>± SD | 6.73 ± 1.24*                           | 12.24 ± 2.35* | 14.26 ± 2.53* | 16.57 ± 1.91* | 18.29 ± 2.27* | 15.88 ± 1.99* | 12.97 ± 1.51* | 11.20 ± 2.01* |
|              | 6.22 ± 1.02*                           | 8.85 ± 1.66*  | 11.09 ± 1.74* | 18.65 ± 2.29* | 20.46 ± 3.06* | 16.68 ± 2.32* | 10.45 ± 1.36* | 10.85 ± 1.98* |

SD, standard deviation; \*  $p = 0.00$  according to Cochran-Armitage test for trend

Table S2. Annual incidence (per 1000 persons) of MASH according to age group in Korea

| Year         | Incidence of Male/Female by age (year) |              |              |              |              |              |              | Total        |
|--------------|----------------------------------------|--------------|--------------|--------------|--------------|--------------|--------------|--------------|
|              | 20-29                                  | 30-39        | 40-49        | 50-59        | 60-69        | 70-79        | ≥ 80         |              |
| 2010         | 0.23                                   | 0.37         | 0.43         | 0.63         | 0.77         | 0.80         | 1.02         | 0.39         |
|              | 0.20                                   | 0.26         | 0.33         | 0.61         | 0.78         | 0.81         | 0.68         | 0.36         |
| 2011         | 0.49                                   | 0.86         | 0.95         | 1.20         | 1.32         | 1.31         | 1.49         | 0.78         |
|              | 0.35                                   | 0.51         | 0.65         | 1.25         | 1.36         | 1.17         | 1.00         | 0.66         |
| 2012         | 0.59                                   | 1.07         | 1.14         | 1.33         | 1.45         | 1.45         | 1.44         | 0.92         |
|              | 0.40                                   | 0.60         | 0.77         | 1.42         | 1.59         | 1.34         | 0.99         | 0.78         |
| 2013         | 0.65                                   | 1.20         | 1.24         | 1.39         | 1.62         | 1.47         | 1.30         | 1.02         |
|              | 0.45                                   | 0.67         | 0.87         | 1.58         | 1.74         | 1.36         | 1.04         | 0.88         |
| 2014         | 0.67                                   | 1.25         | 1.31         | 1.45         | 1.60         | 1.45         | 1.30         | 1.06         |
|              | 0.49                                   | 0.69         | 0.88         | 1.59         | 1.71         | 1.35         | 1.00         | 0.89         |
| 2015         | 0.82                                   | 1.53         | 1.59         | 1.76         | 2.02         | 1.90         | 1.94         | 1.29         |
|              | 0.57                                   | 0.86         | 1.08         | 1.92         | 2.18         | 1.86         | 1.58         | 1.12         |
| 2016         | 1.06                                   | 1.98         | 2.09         | 2.13         | 2.34         | 2.03         | 2.04         | 1.62         |
|              | 0.79                                   | 1.13         | 1.42         | 2.41         | 2.66         | 2.14         | 1.61         | 1.42         |
| 2017         | 1.64                                   | 3.30         | 3.98         | 4.22         | 4.50         | 3.74         | 3.40         | 2.94         |
|              | 1.12                                   | 1.75         | 2.25         | 3.97         | 4.51         | 4.00         | 2.84         | 2.35         |
| 2018         | 2.71                                   | 5.52         | 6.48         | 6.65         | 7.32         | 6.24         | 5.58         | 4.81         |
|              | 2.00                                   | 3.04         | 3.84         | 6.62         | 7.74         | 6.60         | 4.86         | 4.04         |
| 2019         | 3.24                                   | 6.35         | 7.05         | 6.63         | 7.32         | 6.35         | 5.77         | 5.18         |
|              | 2.41                                   | 3.58         | 4.20         | 6.74         | 7.90         | 6.83         | 4.87         | 4.36         |
| 2020         | 3.52                                   | 6.64         | 7.44         | 6.83         | 7.48         | 6.40         | 5.74         | 5.42         |
|              | 2.68                                   | 3.90         | 4.49         | 6.87         | 8.21         | 6.61         | 4.73         | 4.58         |
| 2021         | 4.03                                   | 7.30         | 8.14         | 7.12         | 7.58         | 6.45         | 5.70         | 5.94         |
|              | 3.15                                   | 4.55         | 5.22         | 7.35         | 8.60         | 6.82         | 4.78         | 5.10         |
| Mean<br>± SD | 1.64 ± 1.36*                           | 3.11 ± 2.59* | 3.49 ± 2.95* | 3.45 ± 2.63* | 3.78 ± 2.84* | 3.30 ± 2.37* | 3.06 ± 2.04* | 2.61 ± 2.12* |
|              | 1.22 ± 1.05*                           | 1.80 ± 1.54* | 2.17 ± 1.77* | 3.53 ± 2.62* | 4.08 ± 3.12* | 3.41 ± 2.57* | 2.50 ± 1.79* | 2.21 ± 1.79* |

SD, standard deviation; \*  $p = 0.00$  according to Cochran-Armitage test for trend
